# Supplementary material for: Mapping the Flammability Space of Sustainable Refrigerant Mixtures through an Artificial Neural Network Based on Molecular Descriptors
Source: PubMed Central journal article supplement (PMC11304399; doi:10.1021/acssuschemeng.4c01961), 2024-07-23
Supplement: sc4c01961_si_001.pdf [file sc4c01961_si_001.pdf]

## Supporting Information

### **Mapping the Flammability Space of Sustainable Refrigerant Mixtures Through an Artificial Neural Network based on Molecular Descriptors**

Carlos G. Albà<sup>1</sup>, Ismail I.I. Alkhatib<sup>2</sup>, Lourdes F. Vega<sup>2\*</sup>, Fèlix Llovell<sup>1\*</sup>

<sup>1</sup>Department of Chemical Engineering, ETSEQ, Universitat Rovira i Virgili (URV), Campus Sescelades, Av. Països Catalans 26, 43007, Tarragona, Spain.

<sup>2</sup>Research and Innovation Center on CO<sub>2</sub> and Hydrogen (RICH Center) and Department of Chemical and Petroleum Engineering, Khalifa University, PO Box 127788, Abu Dhabi, United Arab Emirates.

\* Corresponding authors. *E-mail address*: lourdes.vega@ku.ac.ae; felix.llovell@urv.cat

Number of figures: 4 (Figures S1-S4)

Number of tables: 1 (Table S1)

Number of pages: 9 (S1-S9)

| General Binaries |           |           |          |            |
|------------------|-----------|-----------|----------|------------|
| HFC+HFC          | HFO+HFO   | sHC+sHC   | HO+HO    | RE170+R744 |
| HFC+HFO          | HFO+sHC   | sHC+HO    | HO+R744  |            |
| HFC+sHC          | HFO+HO    | sHC+R744  | HO+RE170 |            |
| HFC+HO           | HFO+R744  | sHC+RE170 |          |            |
| HFC+R744         | HFO+RE170 |           |          |            |
| HFC+RE170        |           |           |          | Total      |

  

| General Binaries |     |    |   |      |
|------------------|-----|----|---|------|
| 402              | 144 | 30 | 0 | 0    |
| 611              | 29  | 3  | 0 |      |
| 74               | 0   | 0  | 1 |      |
| 1                | 91  | 2  |   |      |
| 111              | 0   |    |   |      |
| 1                |     |    |   | 1500 |

| General Ternaries |              |              |             |              |              |             |              |             |            |       |
|-------------------|--------------|--------------|-------------|--------------|--------------|-------------|--------------|-------------|------------|-------|
| HFC+HFC+HFC       | HFO+HFO+HFO  |              |             |              |              |             |              |             |            | Total |
| HFC+HFC+HFO       | HFC+HFC+sHC  | HFC+HFC+HO   | HFC+HFO+HFO | HFC+HFO+sHC  | HFC+HFO+HO   | HFO+HFO+sHC |              |             |            |       |
| HFC+sHC+sHC       | HFC+sHC+HO   | HFO+HFO+HO   | HFO+sHC+sHC | HFO+sHC+HO   | sHC+sHC+HO   |             |              |             |            |       |
| R744+HFC+HFC      | R744+HFC+HFO | R744+HFC+sHC | R744+HFC+HO | R744+HFO+HFO | R744+HFO+sHC | R744+HFO+HO | R744+sHC+sHC | R744+sHC+HO | R744+HO+HO |       |
| RE170+HFC+sHC     |              |              |             |              |              |             |              |             |            |       |

  

| General Ternaries |     |    |     |     |    |    |   |   |   |      |
|-------------------|-----|----|-----|-----|----|----|---|---|---|------|
| 127               | 24  |    |     |     |    |    |   |   |   | 1607 |
| 374               | 110 | 53 | 221 | 127 | 72 | 21 |   |   |   |      |
| 18                | 35  | 7  | 9   | 13  | 1  |    |   |   |   |      |
| 88                | 146 | 52 | 22  | 36  | 29 | 14 | 0 | 7 | 0 |      |
| 1                 |     |    |     |     |    |    |   |   |   |      |

**Figure S1.** Database array for binary and ternary blends used in the developed ANN model.

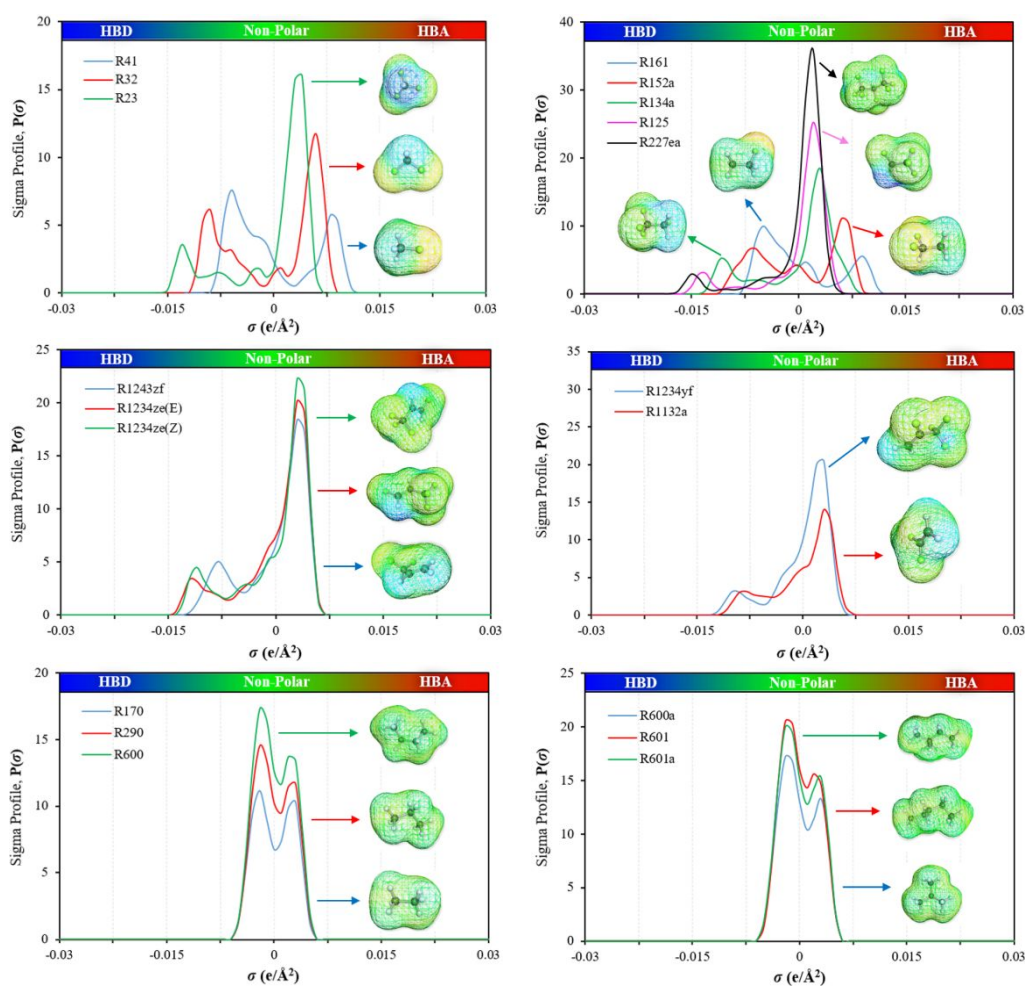

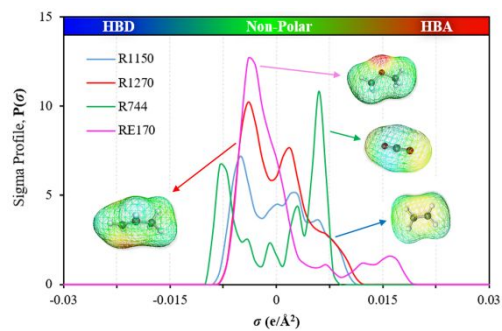

**Figure S2.**  $\sigma$ -profiles of the 23 single-component refrigerants used in this work.

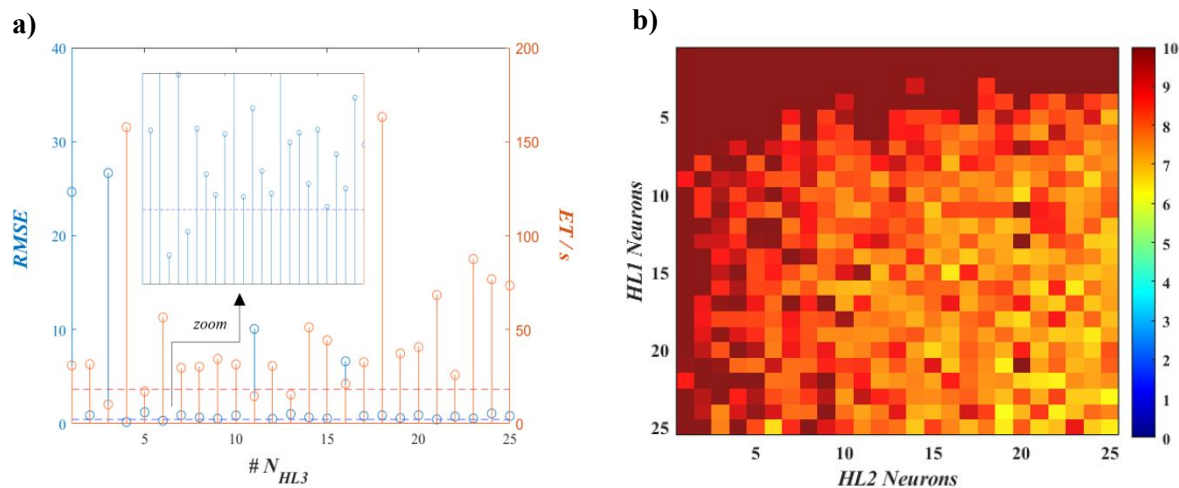

**Figure S3.** **a)** RMSE and elapsed time per epoch for  $[61 (I) \times 14 (HL1) \times 24 (HL2) \times X (HL3) \times 1 (O)]$  ANN architecture as a function of number of neurons in third hidden layer (HL3), and **b)** Mapping of the RMSE variation in relation to the number of neurons in hidden layers 1 and 2 when using 8 input molecular descriptors.

a)

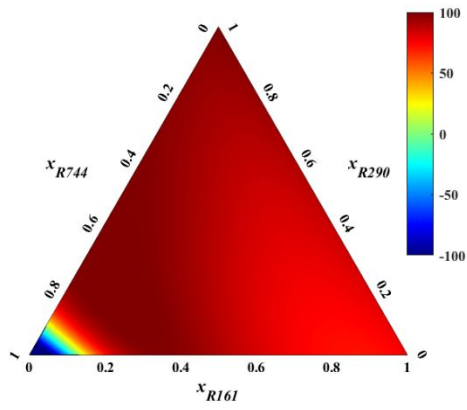

b)

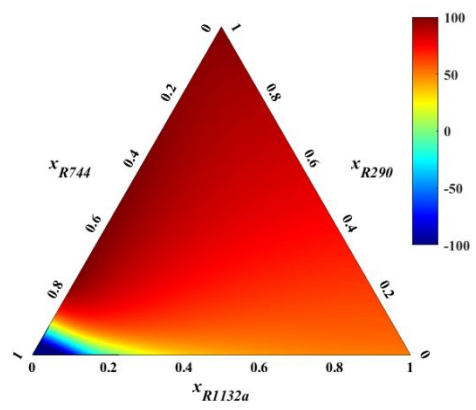

c)

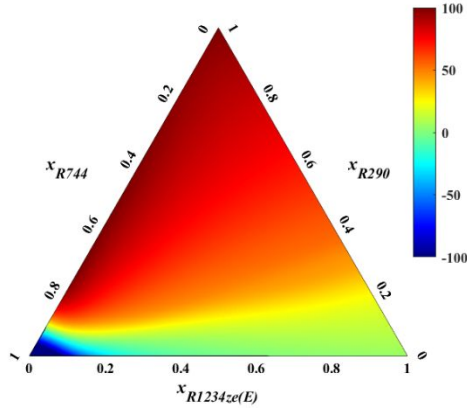

d)

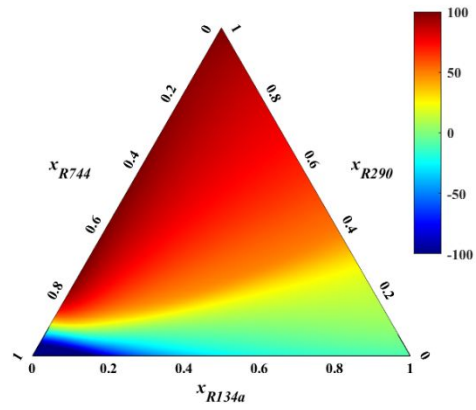

e)

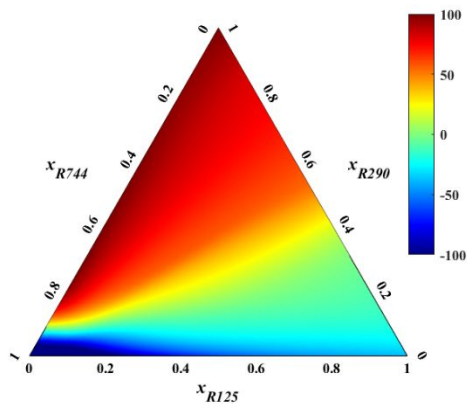

f)

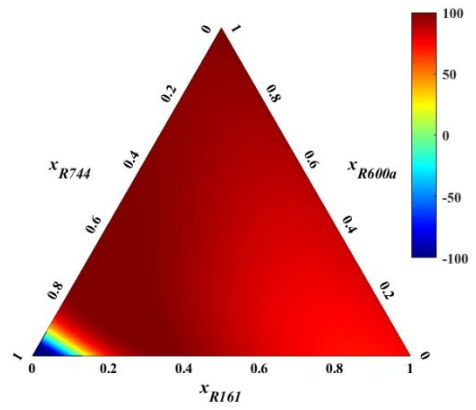

g)

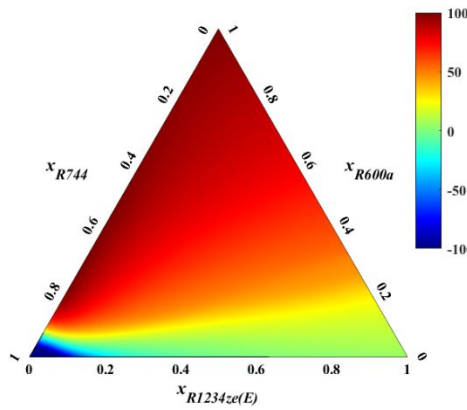

h)

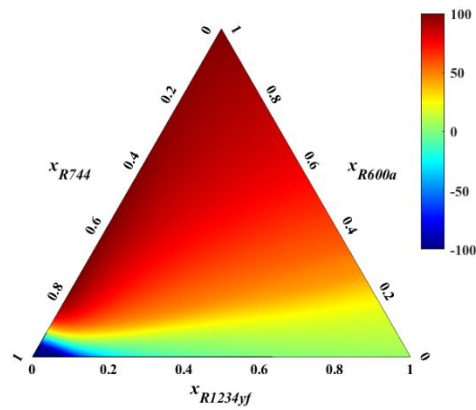

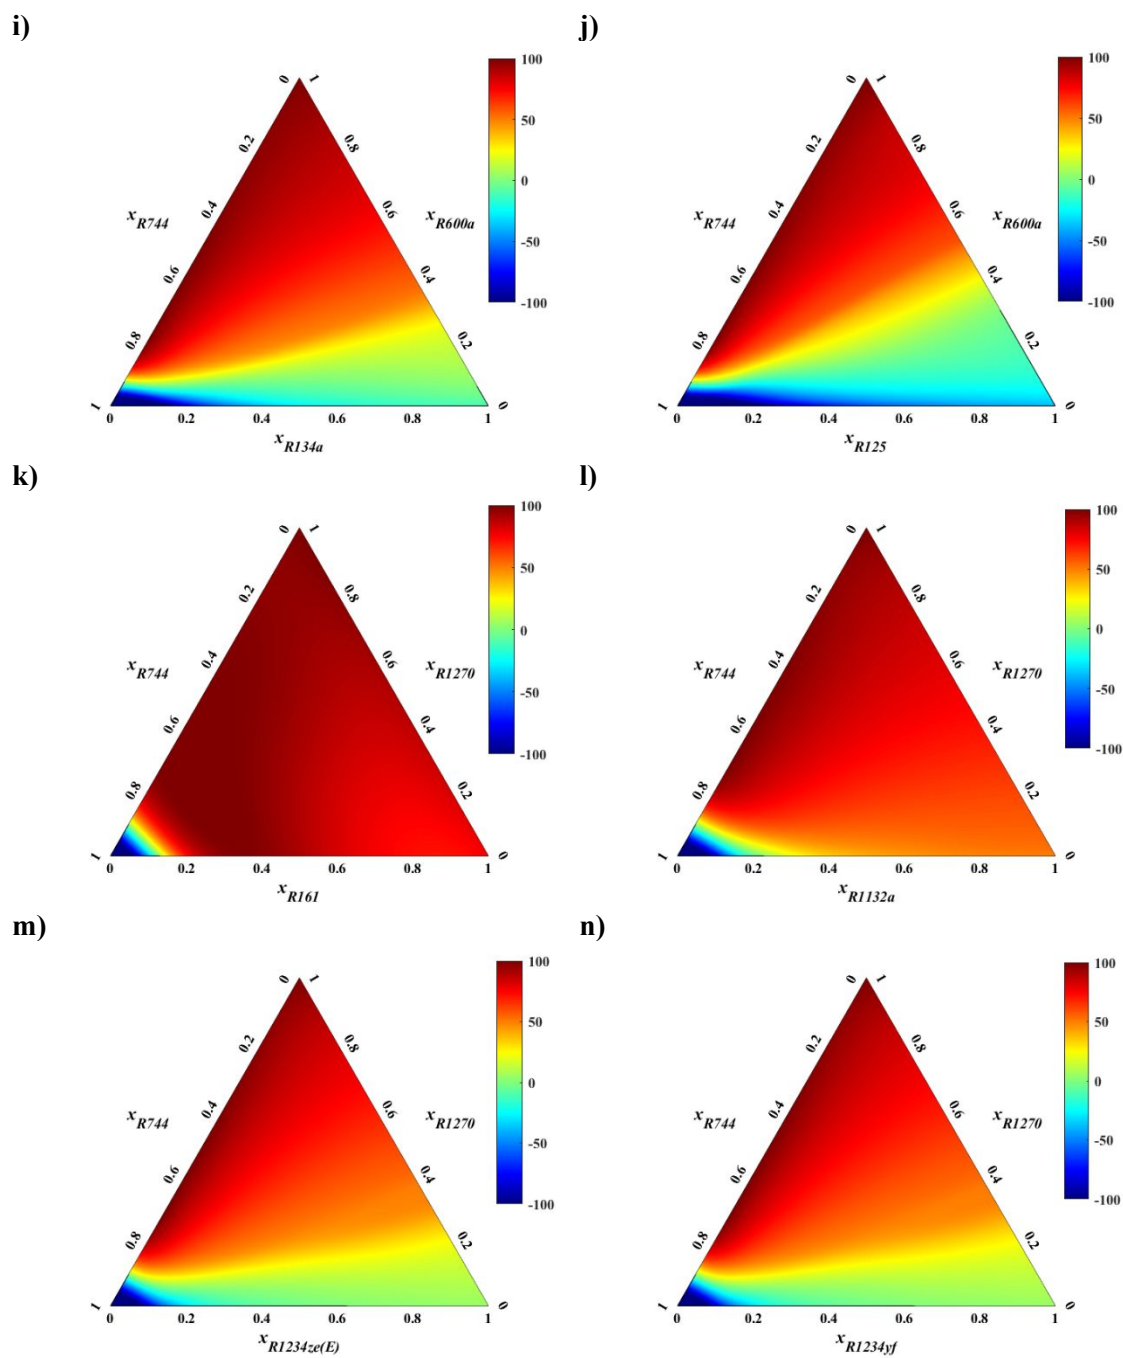

**Figure S4.** Ternary contour plots generated by multitask ANN, depicting predictions of NFI for various  $\text{CO}_2$  blends, including **a)** R290 + R161, **b)** R290 + R1132a, **c)** R290 + R1234ze(E), **d)** R290 + R134a, **e)** R290 + R125, **f)** R600a + R161, **g)** R600a + R1234ze(E), **h)** R600a + R1234yf, **i)** R600a + R134a, **j)** R600a + R125, **k)** R1270 + R161, **l)** R1270 + R1132a, **m)** R1270 + R1234ze(E), and **n)** R1270 + R1234yf.

**Table S1.** Developed ANN's weights and biases in addition to the output function enabling external predictions.

| <i>Hidden Layer 1</i> |                      |                      |                      |                      |                      |                      |                      |                      |                      |                       |                       |                       |                       |                       |
|-----------------------|----------------------|----------------------|----------------------|----------------------|----------------------|----------------------|----------------------|----------------------|----------------------|-----------------------|-----------------------|-----------------------|-----------------------|-----------------------|
|                       | <b>H<sub>1</sub></b> | <b>H<sub>2</sub></b> | <b>H<sub>3</sub></b> | <b>H<sub>4</sub></b> | <b>H<sub>5</sub></b> | <b>H<sub>6</sub></b> | <b>H<sub>7</sub></b> | <b>H<sub>8</sub></b> | <b>H<sub>9</sub></b> | <b>H<sub>10</sub></b> | <b>H<sub>11</sub></b> | <b>H<sub>12</sub></b> | <b>H<sub>13</sub></b> | <b>H<sub>14</sub></b> |
| <b>S<sub>1</sub></b>  |                      |                      |                      |                      |                      |                      |                      |                      |                      |                       |                       |                       |                       |                       |
| <b>S<sub>2</sub></b>  | 0                    | 0                    | 0                    | 0                    | 0                    | 0                    | 0                    | 0                    | 0                    | 0                     | 0                     | 0                     | 0                     | 0                     |
| <b>S<sub>3</sub></b>  | 0                    | 0                    | 0                    | 0                    | 0                    | 0                    | 0                    | 0                    | 0                    | 0                     | 0                     | 0                     | 0                     | 0                     |
| <b>S<sub>4</sub></b>  | 0                    | 0                    | 0                    | 0                    | 0                    | 0                    | 0                    | 0                    | 0                    | 0                     | 0                     | 0                     | 0                     | 0                     |
| <b>S<sub>5</sub></b>  | 0                    | 0                    | 0                    | 0                    | 0                    | 0                    | 0                    | 0                    | 0                    | 0                     | 0                     | 0                     | 0                     | 0                     |
| <b>S<sub>6</sub></b>  | 0                    | 0                    | 0                    | 0                    | 0                    | 0                    | 0                    | 0                    | 0                    | 0                     | 0                     | 0                     | 0                     | 0                     |
| <b>S<sub>7</sub></b>  | 0                    | 0                    | 0                    | 0                    | 0                    | 0                    | 0                    | 0                    | 0                    | 0                     | 0                     | 0                     | 0                     | 0                     |
| <b>S<sub>8</sub></b>  | 0                    | 0                    | 0                    | 0                    | 0                    | 0                    | 0                    | 0                    | 0                    | 0                     | 0                     | 0                     | 0                     | 0                     |
| <b>S<sub>9</sub></b>  | 0                    | 0                    | 0                    | 0                    | 0                    | 0                    | 0                    | 0                    | 0                    | 0                     | 0                     | 0                     | 0                     | 0                     |
| <b>S<sub>10</sub></b> | 0                    | 0                    | 0                    | 0                    | 0                    | 0                    | 0                    | 0                    | 0                    | 0                     | 0                     | 0                     | 0                     | 0                     |
| <b>S<sub>11</sub></b> | 0                    | 0                    | 0                    | 0                    | 0                    | 0                    | 0                    | 0                    | 0                    | 0                     | 0                     | 0                     | 0                     | 0                     |
| <b>S<sub>12</sub></b> | 0                    | 0                    | 0                    | 0                    | 0                    | 0                    | 0                    | 0                    | 0                    | 0                     | 0                     | 0                     | 0                     | 0                     |
| <b>S<sub>13</sub></b> | 0                    | 0                    | 0                    | 0                    | 0                    | 0                    | 0                    | 0                    | 0                    | 0                     | 0                     | 0                     | 0                     | 0                     |
| <b>S<sub>14</sub></b> | 0.8458               | -2.8818              | -1.0014              | 1.0280               | 0.0565               | -2.4029              | -1.8018              | 2.8284               | -1.3958              | -2.6598               | -1.2253               | 1.5103                | -2.4375               | -0.4681               |
| <b>S<sub>15</sub></b> | -0.2075              | 0.5565               | -0.4336              | -0.3225              | 0.8986               | -1.4568              | 0.0141               | -0.5083              | -0.6832              | -0.9620               | 0.0730                | -0.5960               | -0.7045               | -0.3797               |
| <b>S<sub>16</sub></b> | -0.0420              | -0.9716              | 0.1980               | 0.2326               | 0.4817               | -0.5778              | 0.1160               | -0.1190              | -0.2024              | -0.8362               | -0.4973               | 0.3534                | -0.0101               | -0.2451               |
| <b>S<sub>17</sub></b> | -0.1242              | -0.6831              | -0.3918              | 0.0612               | 0.4498               | 0.9127               | 0.3810               | 0.1004               | -0.1382              | 0.0039                | -0.2620               | 0.4858                | 0.0129                | 0.3271                |
| <b>S<sub>18</sub></b> | -0.2648              | 0.7208               | 0.0489               | -0.4739              | 0.3182               | -0.9774              | -0.4748              | 0.6585               | -0.0579              | 0.1070                | 0.3020                | 0.0031                | -0.2046               | -0.0182               |
| <b>S<sub>19</sub></b> | 0.5436               | -0.2822              | 0.1789               | 0.0545               | -0.3789              | 0.3121               | 0.2268               | -0.1822              | -0.0223              | -1.0864               | 0.2265                | -0.1448               | -0.6931               | -0.1322               |
| <b>S<sub>20</sub></b> | -0.0544              | -0.1080              | -0.2226              | 0.1345               | -0.2125              | 0.8676               | 0.1626               | -0.4861              | 0.3767               | 0.2059                | -0.4288               | 0.0671                | 0.2071                | 0.0781                |
| <b>S<sub>21</sub></b> | -0.1340              | 0.1226               | -0.0720              | -0.1219              | 0.1343               | -0.6544              | -0.3892              | -0.1006              | 0.3139               | 0.4365                | -0.2181               | -0.0986               | 0.5160                | 0.0535                |
| <b>S<sub>22</sub></b> | 0.3013               | -0.0026              | 0.3618               | 0.1885               | -0.4095              | 0.7669               | 0.2337               | 0.0294               | -0.8519              | -0.8500               | 0.9069                | 0.0183                | -0.5814               | 0.0328                |
| <b>S<sub>23</sub></b> | 0.0989               | -0.7800              | 0.3459               | 0.1297               | -0.4147              | 0.8101               | -0.1587              | -0.3154              | -0.0937              | 0.6298                | -1.1329               | 0.5140                | 0.0257                | 0.2170                |
| <b>S<sub>24</sub></b> | 0.0783               | 0.3142               | -0.4355              | -0.0218              | -0.0870              | -0.6036              | -0.0510              | -0.1005              | 0.7059               | 0.6007                | 0.2707                | -0.4815               | 0.0817                | -0.2435               |
| <b>S<sub>25</sub></b> | -0.3056              | 1.3469               | -0.0593              | -0.0752              | 0.0691               | -0.4876              | -0.3930              | 0.2413               | -0.6005              | 0.5594                | 1.0563                | -0.3262               | 0.2841                | 0.0201                |
| <b>S<sub>26</sub></b> | -0.6668              | -0.5203              | 0.1390               | 0.1239               | 0.0474               | 0.4045               | 0.0559               | 0.1043               | -0.6262              | 1.6126                | -0.4221               | 0.4299                | 0.3607                | -0.0431               |
| <b>S<sub>27</sub></b> | 0.3305               | -0.0070              | -0.1061              | 0.2185               | 0.0385               | 0.3718               | 0.0391               | -0.0966              | 0.1564               | -1.2582               | 0.5244                | -0.0936               | -0.0046               | 0.1240                |
| <b>S<sub>28</sub></b> | -0.1911              | 0.2889               | -0.1037              | 0.0308               | -0.3479              | -0.7942              | -0.3377              | 0.2884               | -0.0728              | 0.5285                | -0.5527               | -0.1052               | 0.3868                | -0.0964               |
| <b>S<sub>29</sub></b> | -0.7246              | -0.3970              | -0.3013              | 0.1151               | -0.5175              | -0.3552              | 0.4574               | 0.1324               | -0.5002              | 2.5340                | 0.2442                | 0.0971                | 0.3455                | -0.5602               |
| <b>S<sub>30</sub></b> | -0.0133              | 0.4186               | 0.5083               | 0.2190               | 0.3684               | 1.0784               | -0.5578              | -0.2062              | -0.6011              | -1.1690               | 0.4780                | 0.2896                | 0.0142                | 0.8000                |
| <b>S<sub>31</sub></b> | 0.3900               | -0.2749              | 0.0112               | -0.4003              | 0.2787               | -0.1079              | 0.0516               | 0.0322               | 0.8641               | -0.8075               | -0.8632               | -0.1145               | 0.0146                | -0.0451               |
| <b>S<sub>32</sub></b> | 0.3012               | 0.1685               | -0.3948              | 0.0012               | -0.2608              | -0.3707              | 0.3654               | -0.5010              | 0.3648               | 0.0772                | 0.2757                | -0.2886               | -0.0134               | -0.5134               |

|                      |         |         |         |         |         |         |         |         |         |         |         |         |         |         |
|----------------------|---------|---------|---------|---------|---------|---------|---------|---------|---------|---------|---------|---------|---------|---------|
| S <sub>33</sub>      | -0.3695 | 0.2555  | 0.3861  | 0.3996  | 0.1019  | 0.7585  | -0.3733 | -0.1764 | -0.4813 | -0.0184 | 0.2333  | 0.1530  | 0.2254  | 0.6138  |
| S <sub>34</sub>      | 0.1128  | -0.5109 | -0.0800 | -0.5002 | 0.3694  | -0.6640 | 0.3490  | 0.5210  | 0.2498  | -0.2953 | -0.1726 | 0.0795  | -0.3850 | -0.2771 |
| S <sub>35</sub>      | 0.1812  | 0.7339  | -0.1567 | 0.1618  | -0.2162 | -0.2073 | -0.1199 | -0.3285 | -0.1126 | -0.0944 | 0.4139  | -0.1916 | 0.1889  | -0.1669 |
| S <sub>36</sub>      | -0.4721 | -0.6985 | 0.2856  | 0.2656  | 0.1084  | 0.5206  | -0.0305 | -0.2051 | 0.1354  | 0.7381  | -0.5957 | 0.1159  | 0.5055  | 0.3921  |
| S <sub>37</sub>      | 0.2246  | 0.4807  | -0.3618 | -0.5902 | 0.2549  | -0.6401 | 0.1568  | 0.5597  | -0.1226 | -0.9058 | 0.8417  | 0.0656  | -0.3964 | -0.0706 |
| S <sub>38</sub>      | 0.0929  | 0.0432  | 0.1408  | 0.2417  | -0.0592 | -0.1697 | -0.0024 | -0.3407 | -0.0637 | 0.2076  | -0.4002 | -0.0228 | -0.0229 | -0.2159 |
| S <sub>39</sub>      | 0.2257  | -1.1726 | 0.4945  | 0.2524  | -0.0465 | 0.8416  | 0.2879  | -0.5317 | 0.9494  | 0.2598  | -0.8329 | -0.0505 | 0.0145  | 0.2459  |
| S <sub>40</sub>      | 0.6905  | 0.2610  | -0.1590 | -0.2942 | -0.0081 | 0.2651  | 0.2368  | 0.0789  | 0.1985  | -1.6810 | 0.8810  | 0.0659  | -0.5303 | 0.1440  |
| S <sub>41</sub>      | 0.4459  | -0.3950 | 0.3738  | -0.1648 | 0.3883  | -0.9344 | -0.1096 | -0.0361 | -0.9516 | -0.6250 | -1.0354 | 0.7487  | -0.4512 | 0.0779  |
| S <sub>42</sub>      | 0.2501  | 0.1639  | 0.6585  | -0.4493 | -0.0411 | -1.0826 | -0.8020 | 0.3601  | -0.7561 | -0.5254 | -1.1717 | -0.1687 | -0.3834 | -0.3302 |
| S <sub>43</sub>      | -0.7899 | 0.6348  | 0.1914  | 0.6987  | -0.5303 | -0.4871 | 0.3696  | 0.0225  | 0.3617  | -0.2846 | 0.1156  | 0.3481  | -0.3268 | -0.6428 |
| S <sub>44</sub>      | 0.6794  | -0.7828 | -0.0959 | -0.1586 | 0.7576  | -0.4573 | 0.1760  | -0.6900 | -0.0469 | -0.7902 | -0.5326 | -0.7873 | 0.4142  | -0.0299 |
| S <sub>45</sub>      | 0.2992  | 0.4066  | 0.2741  | -0.6989 | -0.6230 | -0.1659 | 0.5104  | 0.1735  | -0.0891 | 0.4978  | 0.0956  | 0.2860  | -0.3166 | 0.3128  |
| S <sub>46</sub>      | -0.4264 | -0.0579 | 0.2603  | 0.4627  | 0.6417  | 0.1776  | -0.2646 | 0.4489  | 0.5059  | 0.2361  | 0.3559  | 0.5683  | -0.1049 | -0.2904 |
| S <sub>47</sub>      | 0.0468  | -0.0539 | -0.7060 | 0.2142  | -0.0446 | -0.5711 | 0.3175  | -0.1118 | -0.4560 | 0.0912  | -0.2672 | -0.4591 | -0.1369 | -0.3181 |
| S <sub>48</sub>      | -0.6722 | -0.2767 | 0.5550  | -0.0732 | 0.6714  | -0.7642 | -0.0076 | 0.5971  | 0.1949  | -0.1274 | 0.2126  | 0.4536  | -0.3957 | -0.2523 |
| S <sub>49</sub>      | -0.9666 | 0.2498  | -0.0633 | 0.7506  | 0.1629  | 0.3114  | 1.2805  | 0.0397  | -0.3651 | -0.0011 | 0.2802  | 0.5257  | 0.5121  | 0.7068  |
| S <sub>50</sub>      | 0.2117  | 4.8667  | -6.7478 | 5.8320  | -4.7707 | -0.8295 | 6.7468  | 5.7124  | 8.0412  | 0.2563  | 5.8112  | 5.9861  | 1.3188  | -7.6719 |
| S <sub>51</sub>      | 0       | 0       | 0       | 0       | 0       | 0       | 0       | 0       | 0       | 0       | 0       | 0       | 0       | 0       |
| S <sub>52</sub>      | 0       | 0       | 0       | 0       | 0       | 0       | 0       | 0       | 0       | 0       | 0       | 0       | 0       | 0       |
| S <sub>53</sub>      | 0       | 0       | 0       | 0       | 0       | 0       | 0       | 0       | 0       | 0       | 0       | 0       | 0       | 0       |
| S <sub>54</sub>      | 0       | 0       | 0       | 0       | 0       | 0       | 0       | 0       | 0       | 0       | 0       | 0       | 0       | 0       |
| S <sub>55</sub>      | 0       | 0       | 0       | 0       | 0       | 0       | 0       | 0       | 0       | 0       | 0       | 0       | 0       | 0       |
| S <sub>56</sub>      | 0       | 0       | 0       | 0       | 0       | 0       | 0       | 0       | 0       | 0       | 0       | 0       | 0       | 0       |
| S <sub>57</sub>      | 0       | 0       | 0       | 0       | 0       | 0       | 0       | 0       | 0       | 0       | 0       | 0       | 0       | 0       |
| S <sub>58</sub>      | 0       | 0       | 0       | 0       | 0       | 0       | 0       | 0       | 0       | 0       | 0       | 0       | 0       | 0       |
| S <sub>59</sub>      | 0       | 0       | 0       | 0       | 0       | 0       | 0       | 0       | 0       | 0       | 0       | 0       | 0       | 0       |
| S <sub>60</sub>      | 0       | 0       | 0       | 0       | 0       | 0       | 0       | 0       | 0       | 0       | 0       | 0       | 0       | 0       |
| S <sub>61</sub>      | 0       | 0       | 0       | 0       | 0       | 0       | 0       | 0       | 0       | 0       | 0       | 0       | 0       | 0       |
| <b>b<sub>1</sub></b> | 0.1353  | -2.2195 | -0.1200 | -3.2270 | 1.4274  | 1.6435  | 0.5930  | -0.5451 | 2.4942  | -2.4254 | -3.1677 | -0.7024 | -0.9291 | -0.0244 |

| <i>Hidden Layer 2</i> |                       |                       |                       |                       |                       |                       |                       |                       |                       |                        |                        |                        |
|-----------------------|-----------------------|-----------------------|-----------------------|-----------------------|-----------------------|-----------------------|-----------------------|-----------------------|-----------------------|------------------------|------------------------|------------------------|
|                       | <b>HH<sub>1</sub></b> | <b>HH<sub>2</sub></b> | <b>HH<sub>3</sub></b> | <b>HH<sub>4</sub></b> | <b>HH<sub>5</sub></b> | <b>HH<sub>6</sub></b> | <b>HH<sub>7</sub></b> | <b>HH<sub>8</sub></b> | <b>HH<sub>9</sub></b> | <b>HH<sub>10</sub></b> | <b>HH<sub>11</sub></b> | <b>HH<sub>12</sub></b> |
| <b>H<sub>1</sub></b>  | -0.9736               | -0.9666               | -0.2496               | -1.0789               | -1.7361               | 0.8504                | 0.1465                | -0.0989               | 0.4060                | 0.6723                 | -0.0490                | 0.5446                 |
| <b>H<sub>2</sub></b>  | -0.1403               | -0.1408               | -0.5551               | -0.3780               | 0.5694                | -0.1034               | -0.2616               | 0.5531                | 1.2341                | -0.1411                | 0.1482                 | 1.0281                 |
| <b>H<sub>3</sub></b>  | 0.9141                | -0.5179               | 0.5083                | 0.3097                | 1.1655                | -0.1528               | -1.0784               | 0.0616                | -0.8161               | -0.7366                | 1.1396                 | -0.4722                |
| <b>H<sub>4</sub></b>  | -0.0151               | 0.8341                | 0.1691                | -0.1395               | -0.6732               | -1.1298               | -0.0353               | -0.4870               | -0.0799               | -0.7731                | 0.0268                 | -0.0450                |
| <b>H<sub>5</sub></b>  | -0.4041               | -0.3617               | -1.2703               | -0.7659               | -1.3013               | -0.1552               | 0.0511                | 0.0172                | 1.1414                | 0.6586                 | -0.7818                | 1.6466                 |
| <b>H<sub>6</sub></b>  | -1.5985               | 0.8163                | 0.0733                | -0.9836               | 0.1540                | -0.0187               | 0.3907                | -1.3976               | -0.8624               | -0.8776                | -0.6272                | -0.4068                |
| <b>H<sub>7</sub></b>  | -0.3881               | 0.6095                | 0.0643                | -0.3551               | 0.6241                | 0.4422                | 0.0965                | 0.0174                | -0.4386               | -0.3572                | 0.2783                 | 0.0528                 |
| <b>H<sub>8</sub></b>  | -0.4478               | -1.3546               | 0.3756                | -0.3951               | -0.5737               | -0.4195               | 0.1443                | -0.2789               | -0.5951               | -0.3784                | -0.9224                | -0.9357                |
| <b>H<sub>9</sub></b>  | 0.0216                | -0.3010               | -0.1021               | -1.6722               | -1.3522               | 0.2581                | -0.5431               | 0.2483                | 0.4768                | -0.3070                | 0.0820                 | 0.5090                 |
| <b>H<sub>10</sub></b> | 1.0890                | -0.2895               | 0.4189                | 0.7706                | -0.8508               | 0.1307                | -0.1802               | 0.3936                | 0.2069                | 0.3856                 | 0.5033                 | -0.0787                |
| <b>H<sub>11</sub></b> | -0.3058               | 0.0690                | 0.2709                | 0.5627                | -1.0444               | -0.7898               | -0.6406               | -1.1523               | 0.0305                | 0.4805                 | 0.3936                 | -1.7033                |
| <b>H<sub>12</sub></b> | -0.0054               | 0.0633                | -0.6880               | 1.9224                | -0.1050               | -1.0584               | 0.1281                | -0.4816               | 0.6330                | 1.2022                 | -0.1686                | 1.1883                 |
| <b>H<sub>13</sub></b> | 1.1005                | -0.8841               | -0.0160               | 0.5523                | 1.0234                | 0.5340                | -0.7862               | 0.0010                | 0.9427                | -0.1897                | -0.8109                | 2.0533                 |
| <b>H<sub>14</sub></b> | 0.4210                | -0.7273               | -0.5702               | 0.5410                | 0.9315                | -0.6775               | -0.0949               | 1.2565                | -0.9530               | -0.2399                | -0.5506                | -0.6708                |
| <b>b<sub>2</sub></b>  | 1.4354                | 1.2921                | 1.3947                | 1.1705                | 1.4242                | -0.1033               | 1.2042                | -0.1800               | 1.3800                | 0.2428                 | 0.6424                 | 0.2635                 |

| <i>Hidden Layer 2 (continuation)</i> |                        |                        |                        |                        |                        |                        |                        |                        |                        |                        |                        |                        |
|--------------------------------------|------------------------|------------------------|------------------------|------------------------|------------------------|------------------------|------------------------|------------------------|------------------------|------------------------|------------------------|------------------------|
|                                      | <b>HH<sub>13</sub></b> | <b>HH<sub>14</sub></b> | <b>HH<sub>15</sub></b> | <b>HH<sub>16</sub></b> | <b>HH<sub>17</sub></b> | <b>HH<sub>18</sub></b> | <b>HH<sub>19</sub></b> | <b>HH<sub>20</sub></b> | <b>HH<sub>21</sub></b> | <b>HH<sub>22</sub></b> | <b>HH<sub>23</sub></b> | <b>HH<sub>24</sub></b> |
| <b>H<sub>1</sub></b>                 | 0.1277                 | 0.3547                 | -0.5744                | -0.1646                | -0.6186                | -0.2490                | 1.2647                 | -0.1917                | -0.2853                | -0.0538                | 0.5955                 | 1.0445                 |
| <b>H<sub>2</sub></b>                 | 0.9935                 | 0.4954                 | -0.1891                | 0.3422                 | -1.5464                | -1.4037                | 0.5618                 | 0.4680                 | 0.3774                 | -0.0625                | 0.6502                 | 0.7284                 |
| <b>H<sub>3</sub></b>                 | -0.3273                | 0.4333                 | 1.0209                 | -1.0051                | -0.0063                | 0.5486                 | -1.0028                | 0.5176                 | 1.5267                 | 0.1244                 | 1.0048                 | 1.6874                 |
| <b>H<sub>4</sub></b>                 | -1.7088                | -0.7940                | 0.1285                 | -0.0501                | 0.6612                 | -0.7574                | 0.0097                 | 0.0305                 | 0.5573                 | -0.1345                | 0.1096                 | -0.5886                |
| <b>H<sub>5</sub></b>                 | -0.5840                | 0.1511                 | 0.2030                 | -0.0389                | -1.4057                | 0.2793                 | 0.5602                 | 0.3263                 | -0.3398                | 0.0903                 | -0.7871                | 1.0246                 |
| <b>H<sub>6</sub></b>                 | -0.4323                | 0.0185                 | -0.3368                | 0.3474                 | 2.6329                 | 1.9890                 | 0.9805                 | 0.3673                 | 0.7953                 | 0.9229                 | 0.8087                 | -0.6728                |
| <b>H<sub>7</sub></b>                 | 0.1431                 | 0.9938                 | 0.4666                 | -0.2076                | 1.1721                 | 0.1023                 | -0.6531                | 0.4515                 | 0.2532                 | 0.1245                 | 0.1330                 | -0.8273                |
| <b>H<sub>8</sub></b>                 | 1.5987                 | -0.4215                | -1.5950                | 0.0558                 | 0.5198                 | 0.1864                 | -1.6606                | -0.3550                | -0.4185                | 0.9727                 | 0.0257                 | 0.1225                 |
| <b>H<sub>9</sub></b>                 | -0.0561                | 0.8727                 | -0.5854                | -0.7616                | -0.1307                | 1.3431                 | 1.0849                 | 0.3158                 | 0.3652                 | 0.1168                 | -1.2679                | -0.5087                |
| <b>H<sub>10</sub></b>                | -0.1359                | -0.4421                | 1.9128                 | -0.2665                | 2.8886                 | 0.9070                 | -0.0831                | -0.6031                | -0.2184                | -1.5533                | -0.3674                | -0.1274                |
| <b>H<sub>11</sub></b>                | 1.8617                 | -1.5216                | -0.6076                | -0.4293                | -0.4676                | -0.0239                | 0.6304                 | 0.3375                 | -0.4912                | -0.0163                | 0.1674                 | -0.9631                |
| <b>H<sub>12</sub></b>                | 0.0334                 | 0.0001                 | -0.4204                | 0.2932                 | 0.7984                 | 1.0063                 | 0.4212                 | 1.0249                 | 0.7497                 | 0.7885                 | 0.2674                 | -0.8087                |
| <b>H<sub>13</sub></b>                | -0.1975                | -1.1089                | -0.0487                | 1.1674                 | -0.5084                | 0.0914                 | -1.5168                | -0.0703                | 0.1331                 | 0.6427                 | -0.7398                | 0.2498                 |
| <b>H<sub>14</sub></b>                | -0.2919                | 1.3184                 | -1.1254                | 1.6070                 | 1.0834                 | -0.9243                | -1.2359                | -0.0689                | -0.2937                | 0.7242                 | 0.6219                 | 0.0282                 |
| <b>b<sub>2</sub></b>                 | 0.4595                 | 1.6282                 | -0.0898                | -0.8157                | 0.0004                 | -1.7517                | 0.6497                 | -0.5375                | -1.0831                | -2.0170                | 1.4198                 | 2.5383                 |



---

***Output Layer***

---

$$\begin{aligned} NFI_{predicted} = & 0.248097(HH_1) - 0.319464(HH_2) + 0.162838(HH_3) + 0.008849(HH_4) + 1.808459(HH_5) + 0.085165(HH_6) + 0.205977(HH_7) \\ & + 0.264793(HH_8) - 0.620327(HH_9) - 0.029470(HH_{10}) - 0.221097(HH_{11}) + 0.488371(HH_{12}) - 0.178911(HH_{13}) - 0.272909(HH_{14}) \\ & + 0.123859(HH_{15}) - 0.151293(HH_{16}) + 0.029668(HH_{17}) + 0.055991(HH_{18}) - 0.209633(HH_{19}) + 0.237560(HH_{20}) + 0.126407(HH_{21}) + 0.166035(HH_{22}) + 0.1 \\ & - 0.433878 \end{aligned}$$

---
